# Supplementary material
Source: Springer Nature journal article supplement (https://www.springermedizin.de/resource/supplementary/12957_2011_966_MOESM3_ESM.pdf/9562050)

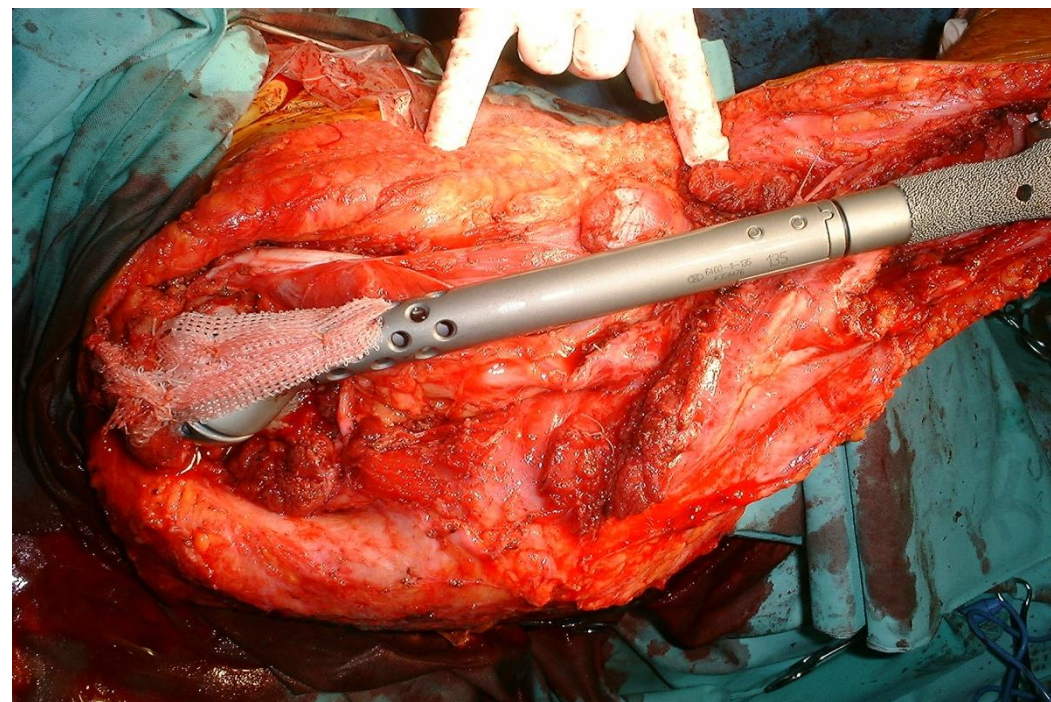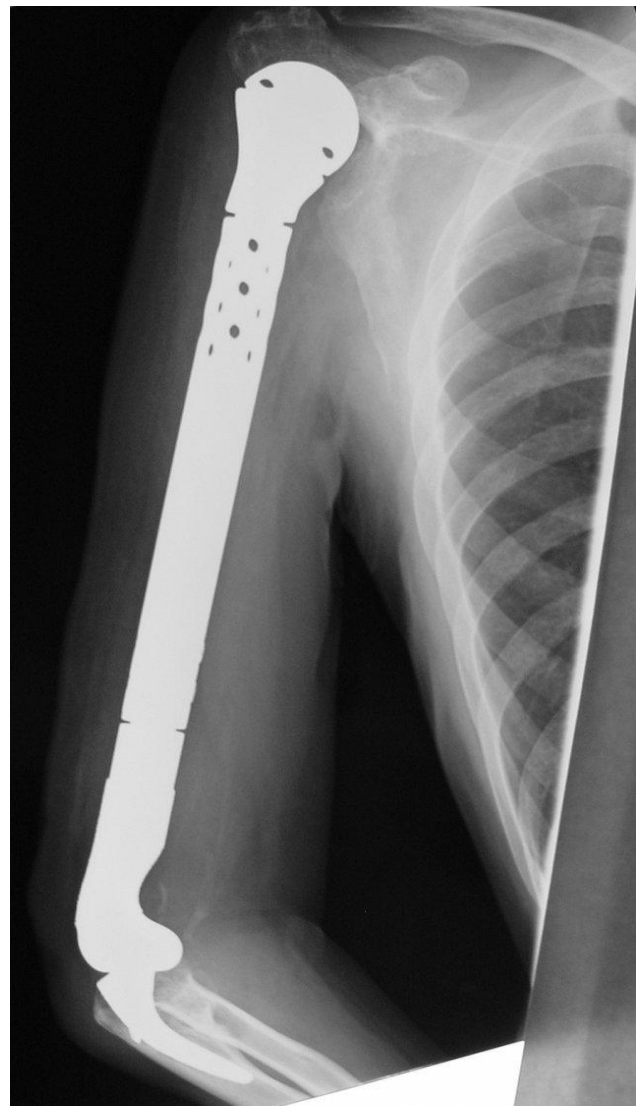

Supplement: MOESM3 [file 9562050]
